# Supplementary material for: Immigrant Health Inequities: Exposing Diversions and White Supremacy
Source: MDPI journal article supplement (doi:10.3390/socsci10090341), 2021-09-13
Supplement: s1 [file s1]

**Table 2. Exemplar Articles that do not Engage in Diversions**

| Author, Year                                                                                                                                | Journal                                                  | Title                                                                                                                                         | Methods       | Career Stage at Publication        | Funding                                                                                                                                                                                                                                                                                                                                                                                         |
|---------------------------------------------------------------------------------------------------------------------------------------------|----------------------------------------------------------|-----------------------------------------------------------------------------------------------------------------------------------------------|---------------|------------------------------------|-------------------------------------------------------------------------------------------------------------------------------------------------------------------------------------------------------------------------------------------------------------------------------------------------------------------------------------------------------------------------------------------------|
| Steven P. Wallace, Maria-Elena De Trinidad Young, Michael A. Rodríguez, Claire D. Brindis, 2019                                             | <i>Social Science &amp; Medicine – Population Health</i> | A Social Determinants Framework Identifying State-Level Immigrant Policies and Their Influence on Health                                      | Qualitative   | RCMAR Coordinating Center Director | UC Global Health Institute, Center of Excellence on Migration and Health, the National Institute on Minority Health and Health Disparities Grant #R01MD012292-02R, and the Department of Health and Human Services, Health Resources and Services Administration, Maternal and Child Health Bureau, Division of Child, Adolescent and Family Health, Adolescent Health Branch Grant #U45MC27709 |
| Airín D. Martínez, Lillian Ruelas, Douglas A. Granger, 2018                                                                                 | <i>Social Science &amp; Medicine – Population Health</i> | Household Fear of Deportation in Relation to Chronic Stressors and Salivary Proinflammatory Cytokines in Mexican Origin Families Post-SB 1070 | Quantitative  | Assistant Professor                | None                                                                                                                                                                                                                                                                                                                                                                                            |
| Javier M. Rodriguez, 2019                                                                                                                   | <i>Social Science &amp; Medicine – Population Health</i> | The Politics Hypothesis and Racial Disparities in Infants' Health in the United States                                                        | Quantitative  | Assistant Professor                | None                                                                                                                                                                                                                                                                                                                                                                                            |
| Meredith Minkler, Alicia L. Salvatore, Charlotte Chang, Megan Gaydos, Shaw San Liu, Pam Tau Lee, Alex Tom, Rajiv Bhatia, Niklas Krause 2014 | <i>American Journal of Public Health</i>                 | Wage Theft as a Neglected Public Health Problem: an Overview and Case Study from San Francisco's Chinatown District                           | Mixed Methods | Professor                          | National Institute for Occupational Safety and Health/Centers for Disease Control and Prevention Grant R219081                                                                                                                                                                                                                                                                                  |
